# Supplementary material
Source: PubMed Central journal article supplement (PMC7817203)
Supplement: pnas.2008072118.sapp.pdf [file pnas.2008072118.sapp.pdf]

*Supporting Information*

**A protease-activated, near-infrared fluorescent probe for  
early endoscopic detection of premalignant gastrointestinal lesions**

*Authors*

Joshua J. Yim<sup>1\*</sup>, Stefan Harmsen<sup>2,3\*</sup>, Krzysztof Flisikowski<sup>4</sup>, Tatiana Flisikowska<sup>4</sup>, Hong Namkoong<sup>5</sup>, Megan Garland<sup>6</sup>, Nynke S. van den Berg<sup>7</sup>, José G. Vilches-Moure<sup>8</sup>, Angelika Schnieke<sup>4</sup>, Dieter Saur<sup>9-11</sup>, Sarah Glasl<sup>12,13</sup>, Dimitris Gorpas<sup>12,13</sup>, Aida Habtezion<sup>5</sup>, Vasilis Ntziachristos<sup>12,13</sup>, Christopher H. Contag<sup>14</sup>, Sanjiv S. Gambhir<sup>2,15,16,†</sup>, Matthew Bogyo<sup>1,17,18,#</sup>,  
Stephan Rogalla<sup>2,5,#</sup>

\*equal contribution, †Deceased July 18, 2020

*Affiliations*

<sup>1</sup>Department of Chemical and Systems Biology, Stanford University School of Medicine, Stanford, CA, USA

<sup>2</sup>Department of Radiology, Bio-X Program and Molecular Imaging Program at Stanford University (MIPS), Stanford University School of Medicine, Stanford, CA, USA

<sup>3</sup>Department of Radiology, Perelman School of Medicine at the University of Pennsylvania, Philadelphia, USA

<sup>4</sup>Chair of Livestock Biotechnology, Technische Universität München, Freising, Germany

<sup>5</sup>Department of Medicine, Division of Gastroenterology & Hepatology, Stanford University School of Medicine, Stanford, CA, USA

<sup>6</sup>Department of Cancer Biology, Stanford University School of Medicine  
Stanford, CA, USA

<sup>7</sup>Department of Otolaryngology – Head and Neck Surgery, Stanford University School of Medicine, Stanford, CA, USA

<sup>8</sup>Department of Comparative Medicine, Stanford School of Medicine, Stanford, CA, USA

<sup>9</sup>Division of Translational Cancer Research, German Cancer Research Center (DKFZ) and German Cancer Consortium (DKTK), Heidelberg, Germany

<sup>10</sup>Chair of Translational Cancer Research and Institute for Experimental Cancer Therapy, Klinikum rechts der Isar, School of Medicine, Technische Universität München, Munich, Germany

<sup>11</sup>Department of Internal Medicine II, Klinikum rechts der Isar, Technische Universität München, Munich, Germany

<sup>12</sup>Helmholtz Zentrum München, German Research Center for Environmental Health, Institute of Biological and Medical Imaging, Neuherberg, Germany

<sup>13</sup>Chair of Biological Imaging, TranslaTUM, Technische Universität München, Munich, Germany

<sup>14</sup>Department of Biomedical Engineering, Institute for Quantitative Health Science and Engineering, Michigan State University, East Lansing, MI, USA

<sup>15</sup>Department of Bioengineering, Department of Materials Science & Engineering Stanford University, Stanford, CA, USA

<sup>16</sup>Canary Center at Stanford for Early Cancer Detection, Palo Alto, CA, USA

<sup>17</sup>Department of Pathology, Stanford University School of Medicine, Stanford, CA, USA

<sup>18</sup>Department of Microbiology and Immunology, Stanford University School of Medicine, Stanford, CA, USA

The authors declare no competing interest.

<sup>#</sup>To whom correspondence may be addressed. Email: [srogalla@stanford.edu](mailto:srogalla@stanford.edu) or [mbogyo@stanford.edu](mailto:mbogyo@stanford.edu)

SI Appendix Figure 1  
H&E

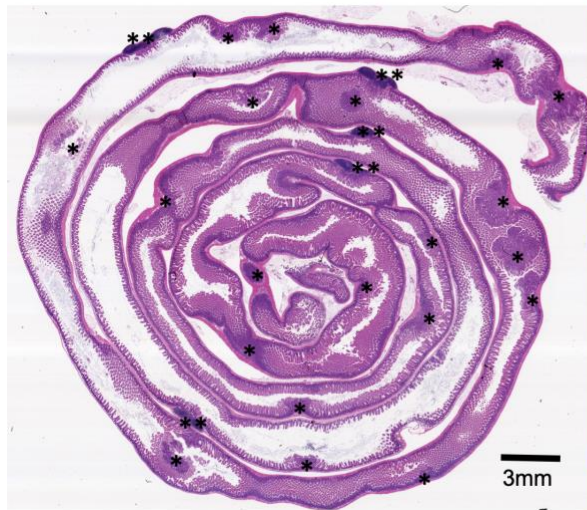

NIRF

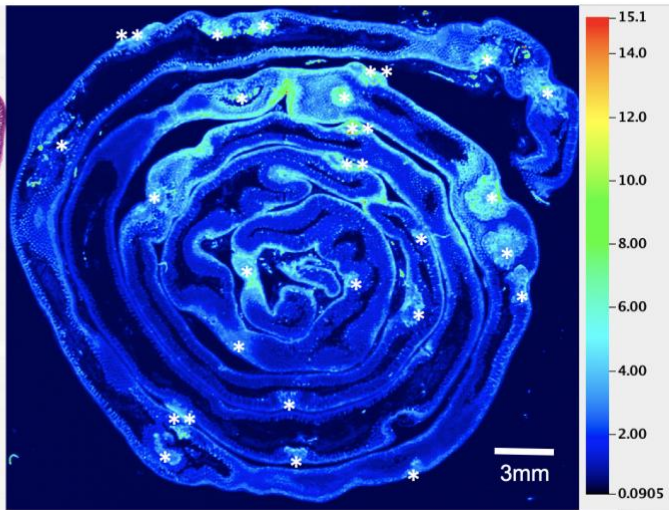

**Supplemental Figure 1. NIRF Imaging of colorectal carcinogenesis in *Apc<sup>min/+</sup>* mice using 6QC-ICG.** H&E stained slide from tissue section deeper within the tissue block from **Figure 2**. (\*) identified as adenoma; (\*\*) identified as gut-associated lymphoid tissue (GALT).

## SI Appendix Figure 2

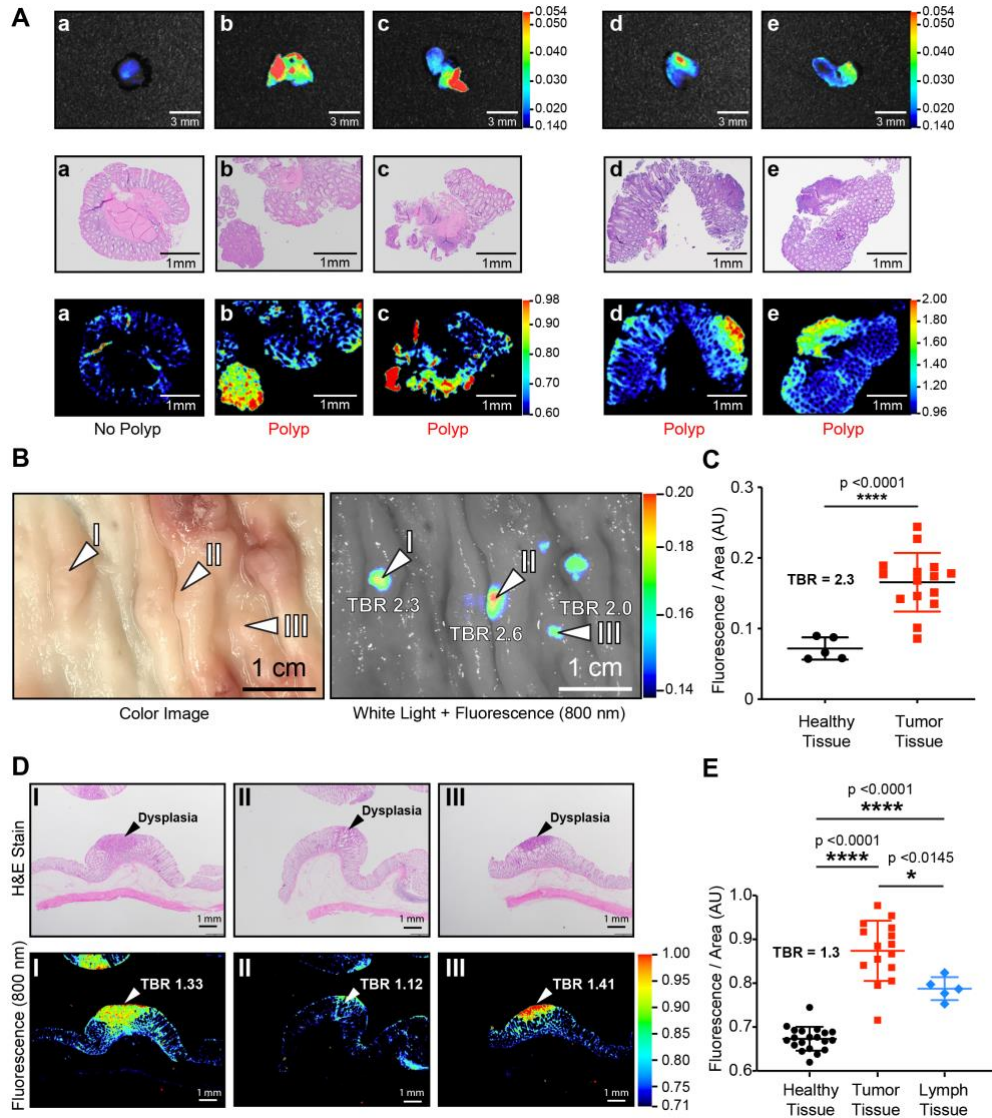

**Supplemental Figure 2. NIRF-guided biopsy in porcine model of colorectal carcinogenesis with 0.25 mg/kg dose of 6QC-ICG.** (A) Top row shows wide-field NIRF images of tissues obtained during NIRF-guided biopsy. The middle row shows corresponding H&E stained tissue of biopsied tissue and confirms the histological status of the tissues. (B) Images and tissue scans of colon tissue from an  $APC^{1311/+}$  porcine model injected IV with 6QC-ICG (sacrificed at 24 h PI, 0.25 mg/kg). Wide-field imaging with white-light (top) and corresponding 800 nm fluorescence image (bottom). (C) Colon tissue slices stained with H&E (top) and their corresponding flat-bed imager 800 nm scans (bottom). (D) Quantification of fluorescence signals of healthy and tumor tissue from wide field imager for  $APC^{1311/+}$  pig injected with 0.25 mg/kg of probe. (E) Quantification of fluorescence of healthy, tumor, and lymph sections of scanned colon tissue taken from the  $APC^{1311/+}$  pigs injected with 0.25 mg/kg of probe. Error bars are standard deviation.

## SI Appendix Figure 3 – Calculation of performance of 6QC-ICG

### Fig 2. *Apc<sup>min/+</sup>* Mice

- A. True Positive = 19  
 B. False Positive = 1  
 C. False Negative = 1  
 D. True Negative = 15
- Sensitivity =  $19/20 = 95.0\%$
  - Specificity =  $15/16 = 93.8\%$
  - Precision =  $19/20 = 95.0\%$

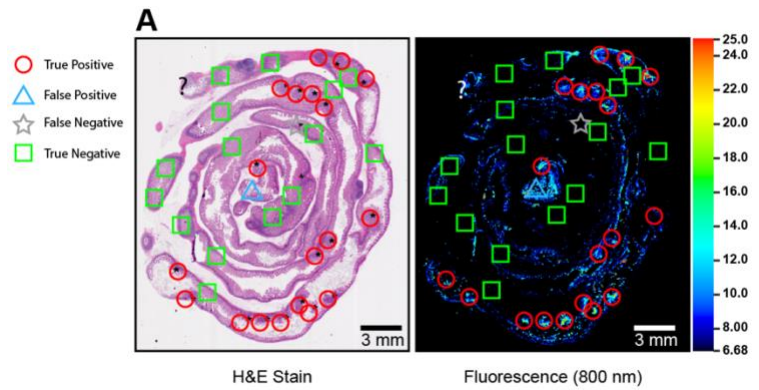

### Fig 4. *APC<sup>1311/+</sup>* Pig Colon (1.0 mg/kg)

- A. True Positive = 17  
 B. False Positive = 0  
 C. False Negative = 0  
 D. True Negative = 3
- Sensitivity =  $17/17 = 100\%$
  - Specificity =  $3/3 = 100\%$
  - Precision =  $17/17 = 100\%$

### Fig 4 SI. Pig Colon (0.25 mg/kg)

- A. True Positive = 14  
 B. False Positive = 1  
 C. False Negative = 1  
 D. True Negative = 4
- Sensitivity =  $14/15 = 93.3\%$
  - Specificity =  $4/5 = 80.0\%$
  - Precision =  $14/15 = 93.3\%$

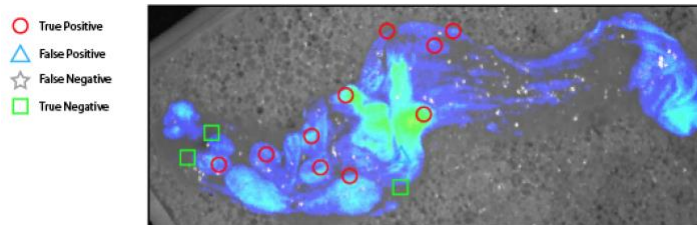

### Fig 5. HET AOM-DSS

- A. True Positive = 10  
 B. False Positive = 0  
 C. False Negative = 0  
 D. True Negative = 3

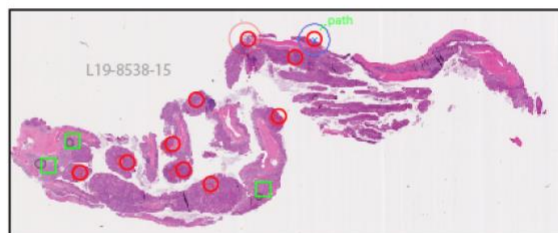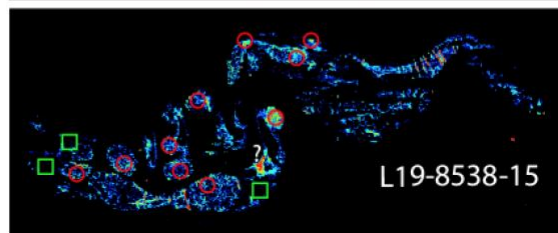

- Sensitivity =  $10/10 = 100\%$
- Specificity =  $3/3 = 100\%$
- Precision =  $10/10 = 100\%$

### **SI Appendix Video 1**

Video screen capture of WL/NIRF endoscopic surveillance in  $Apc^{Pirc/+}$  rat with **6QC-ICG** treatment (18 h PI, 1.2 mg/kg). **Left:** White light (WL) video imaging with near-infrared fluorescence (NIRF) detector in yellow. **Right:** Corresponding NIRF video imaging corresponding to polyps found in WL imaging.

### **SI Appendix Video 2**

Video screen capture of WL/NIRF endoscopic surveillance in  $APC^{1311/+}$  pig with **6QC-ICG** treatment (18 h PI, 1.0 mg/kg). **Top left:** White light (WL) video imaging. **Bottom Left:** Corresponding near-infrared fluorescence (NIRF) video imaging. **Right:** Overlay merge of WL and NIRF video.
